# Supplementary material for: See-through, flexible thin-film CMOS using a blend of tellurium and its oxide as a high-mobility p-type semiconductor
Source: Research Square preprint supplement (doi:10.21203/rs.3.rs-7344414/v1), 2025-09-25
Supplement: Supplementary file 1 [file 1d092f667808c72de0f71548.docx]

Supplementary Information

**See-through, flexible thin-film CMOS using a blend of tellurium and its oxide as a high-mobility p-type semiconductor**

Himchan Oh1, Sung Haeng Cho1*, Jeho Na1, Ji-Young Oh1, Jae-Eun Pi2, Sooji Nam1, Kyunghee Choi1, and Chi-Sun Hwang2*

1Flexible Electronics Research Section, Electronics & Telecommunications Research Institute (ETRI), Daejon 34129, Republic of Korea

2Reality Display Research Section, Electronics & Telecommunications Research Institute (ETRI), Daejon 34129, Republic of Korea

*Corresponding authors, E-mail addresses: helloshcho@etri.re.kr, and hwang-cs@etri.re.kr


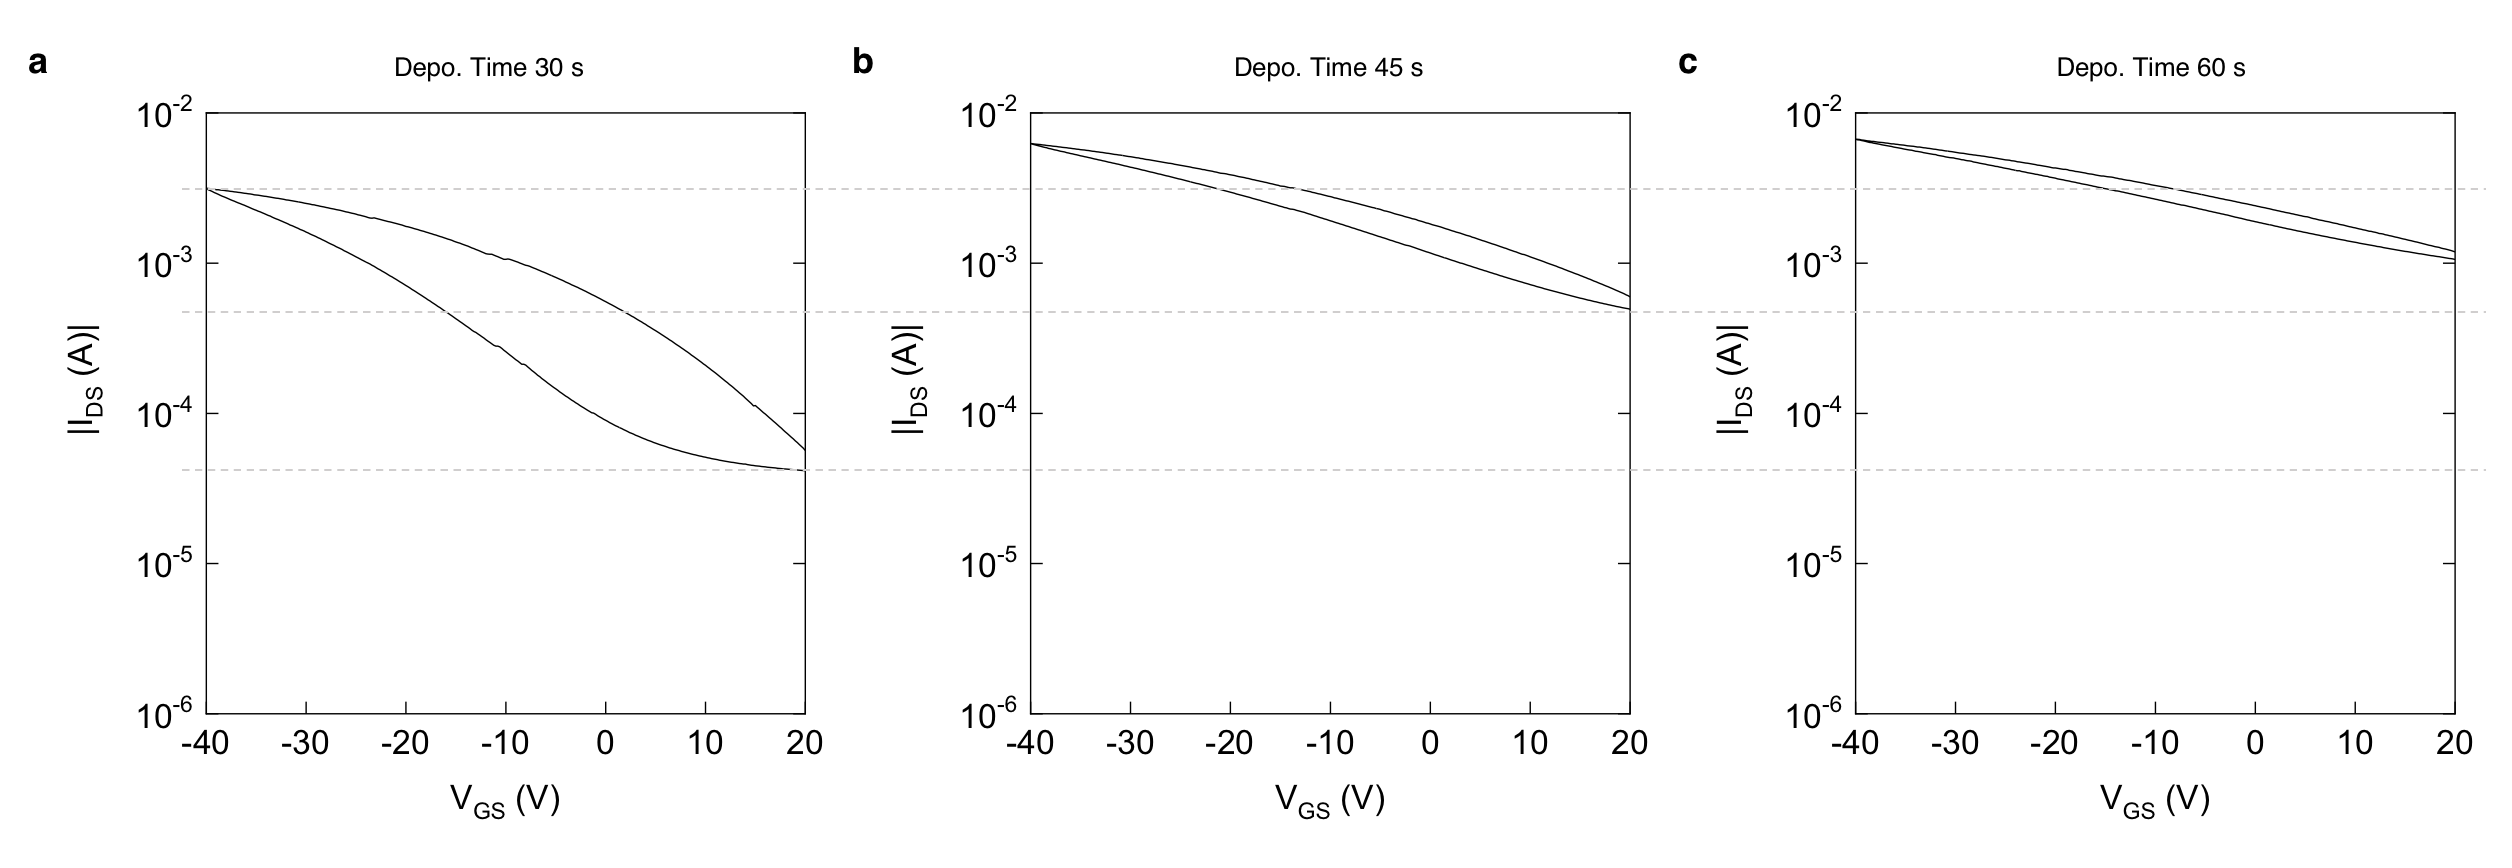


**Supplementary Figure 1 | Transfer characteristics of pure tellurium thin-film transistors with different deposition times.** **a**, 30 s (same as Fig. 1h in the main text). **b**, 45 s. **c**, 60 s.


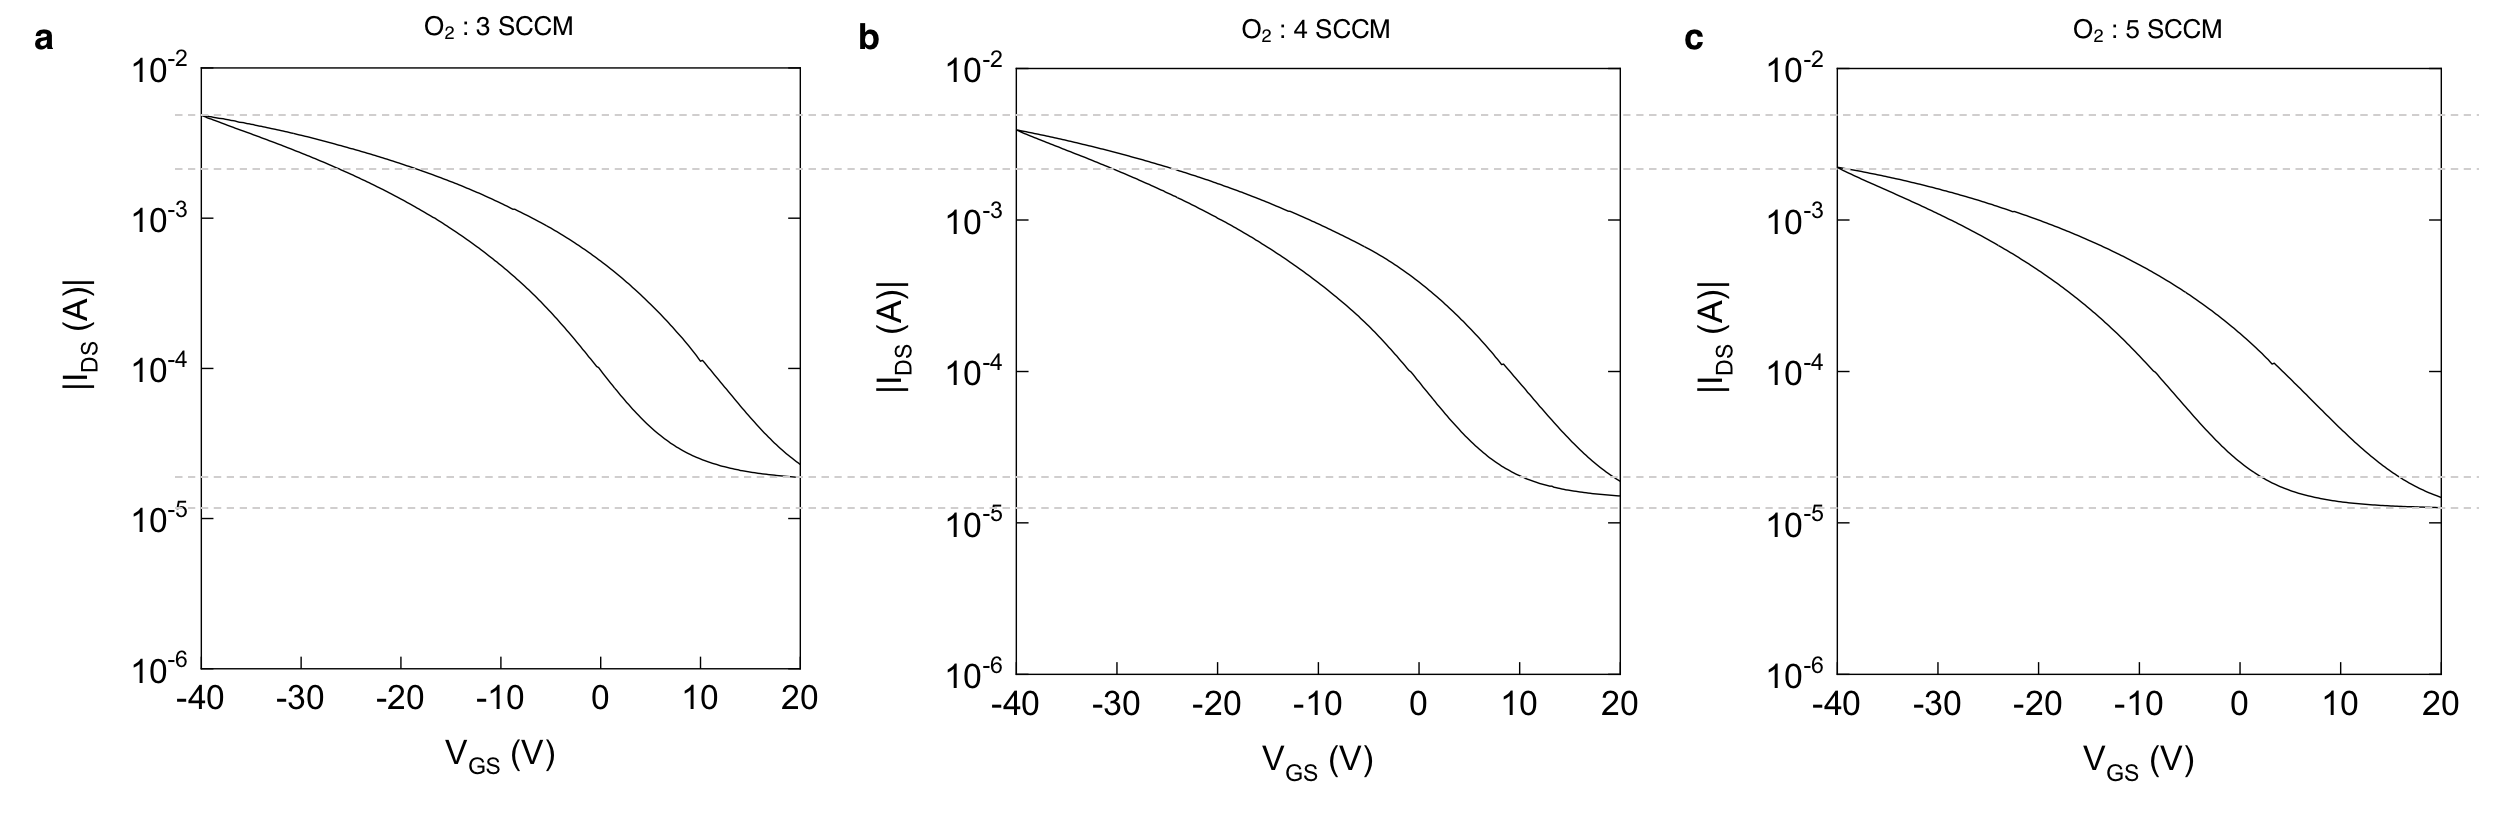


**Supplementary Figure 2 | Transfer characteristics of reactively sputtered TeOx thin-film transistors with different O2 flow rate during depositions. a**, 3 SCCM (same as Fig. 1i in the main text). **b**, 4 SCCM. **c**, 5 SCCM.

**
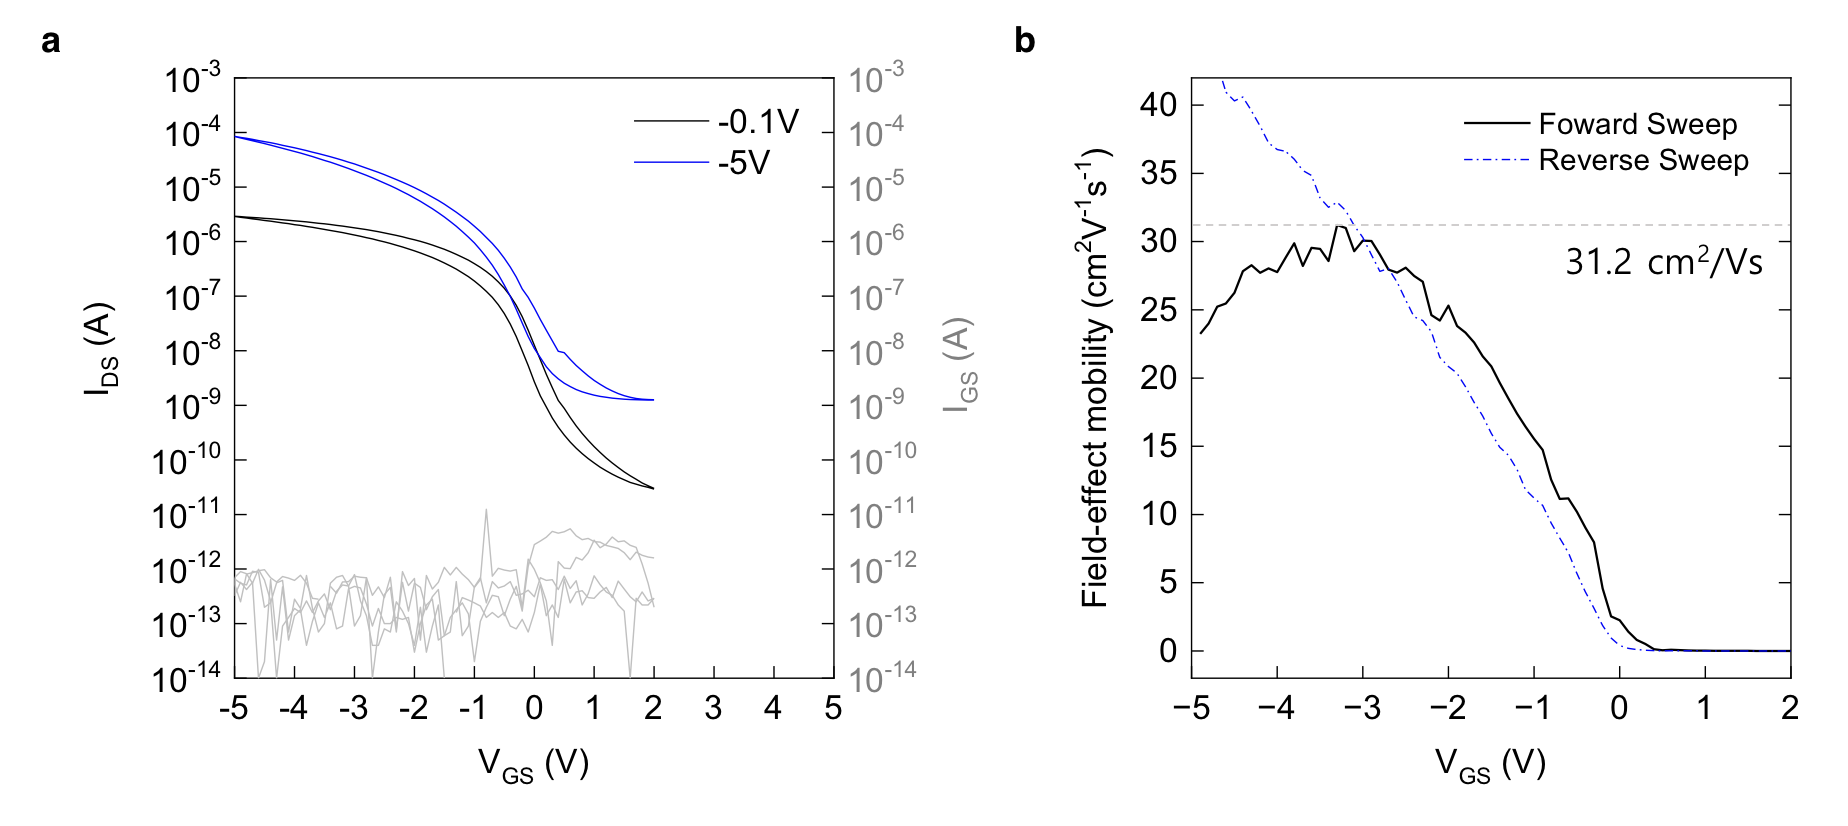
**

**Supplementary Figure 3 | Device characteristics of the high-mobility Te/TeO2 blended channel transistor (Te/TeO2 power ratio : 42 W / 14 W). a**, Transfer characteristic. **b**, Field-effect mobility curve.


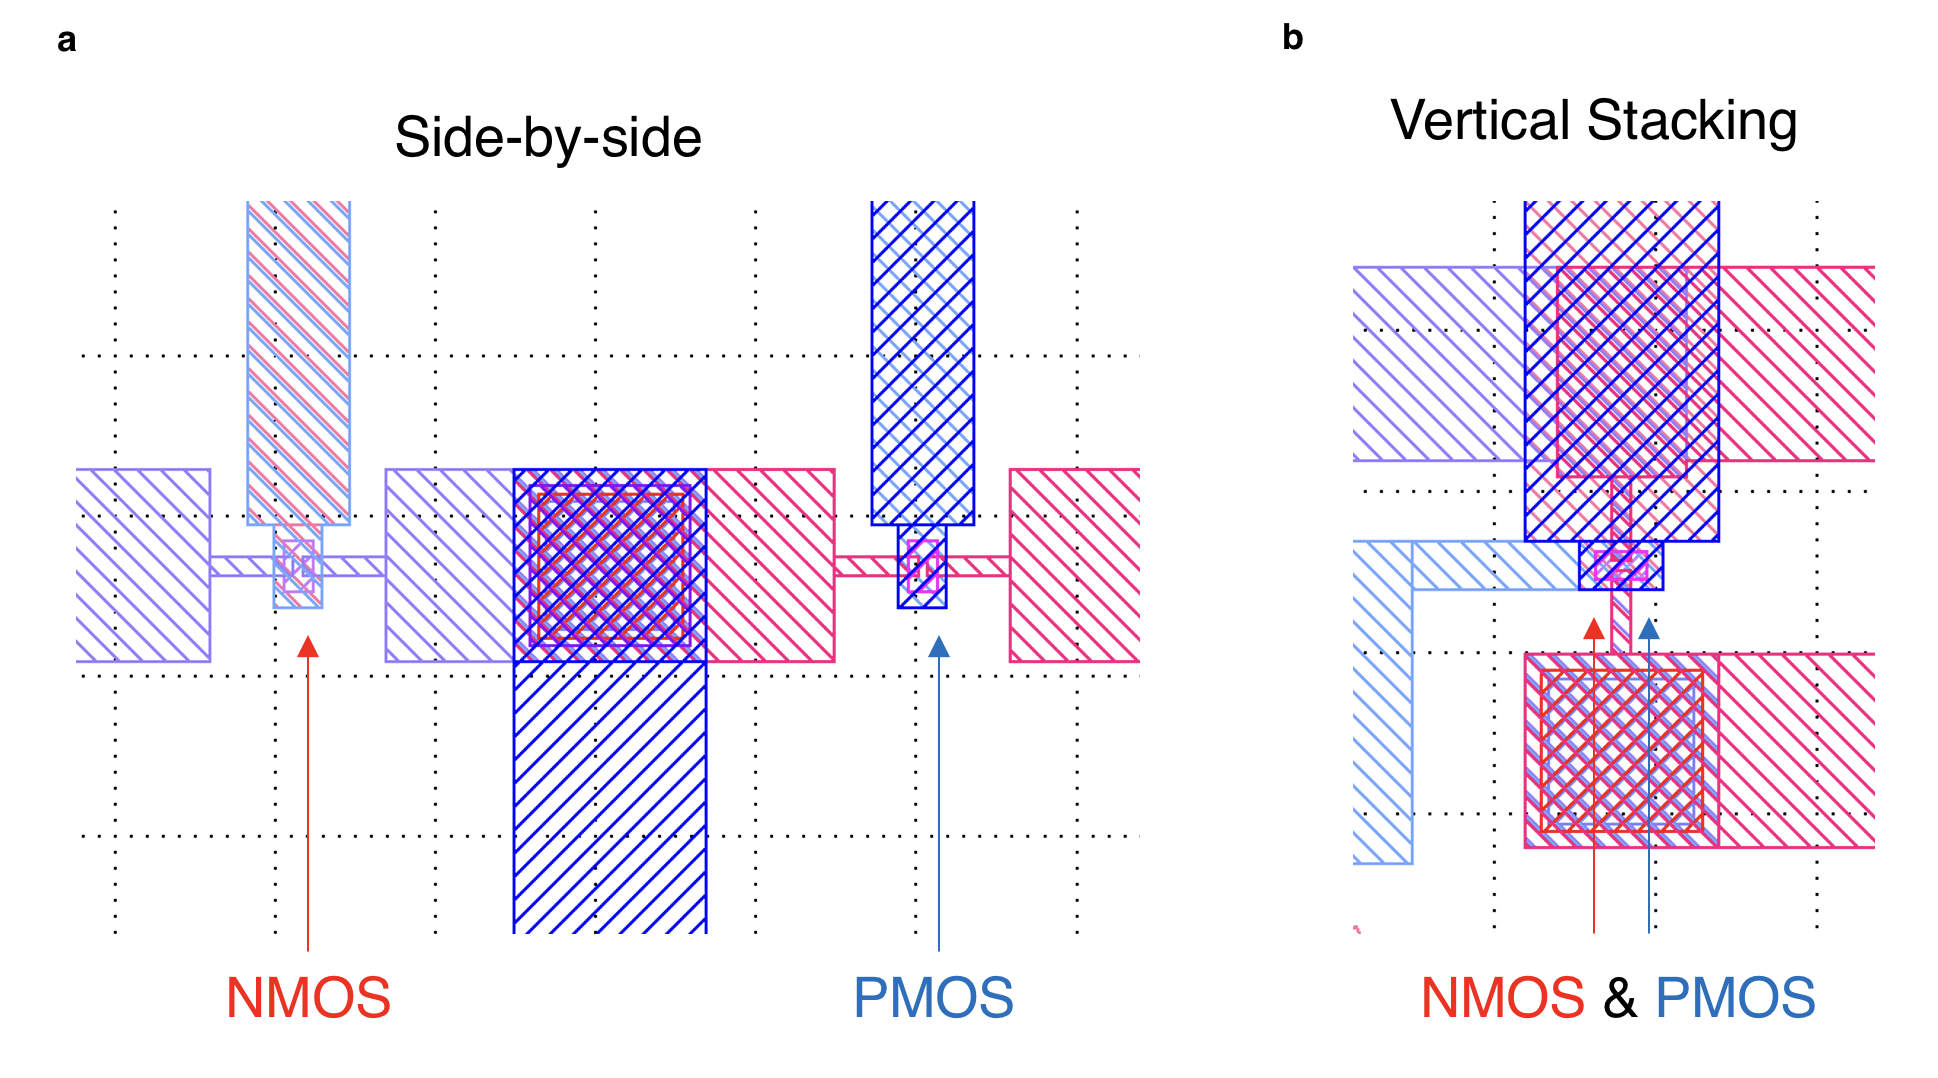


**Supplementary Figure 4 | Layouts of CMOS inverters.** **a**, Side-by-side configuration. **b**, Vertical integration with complete overlap of NMOS and PMOS.

**
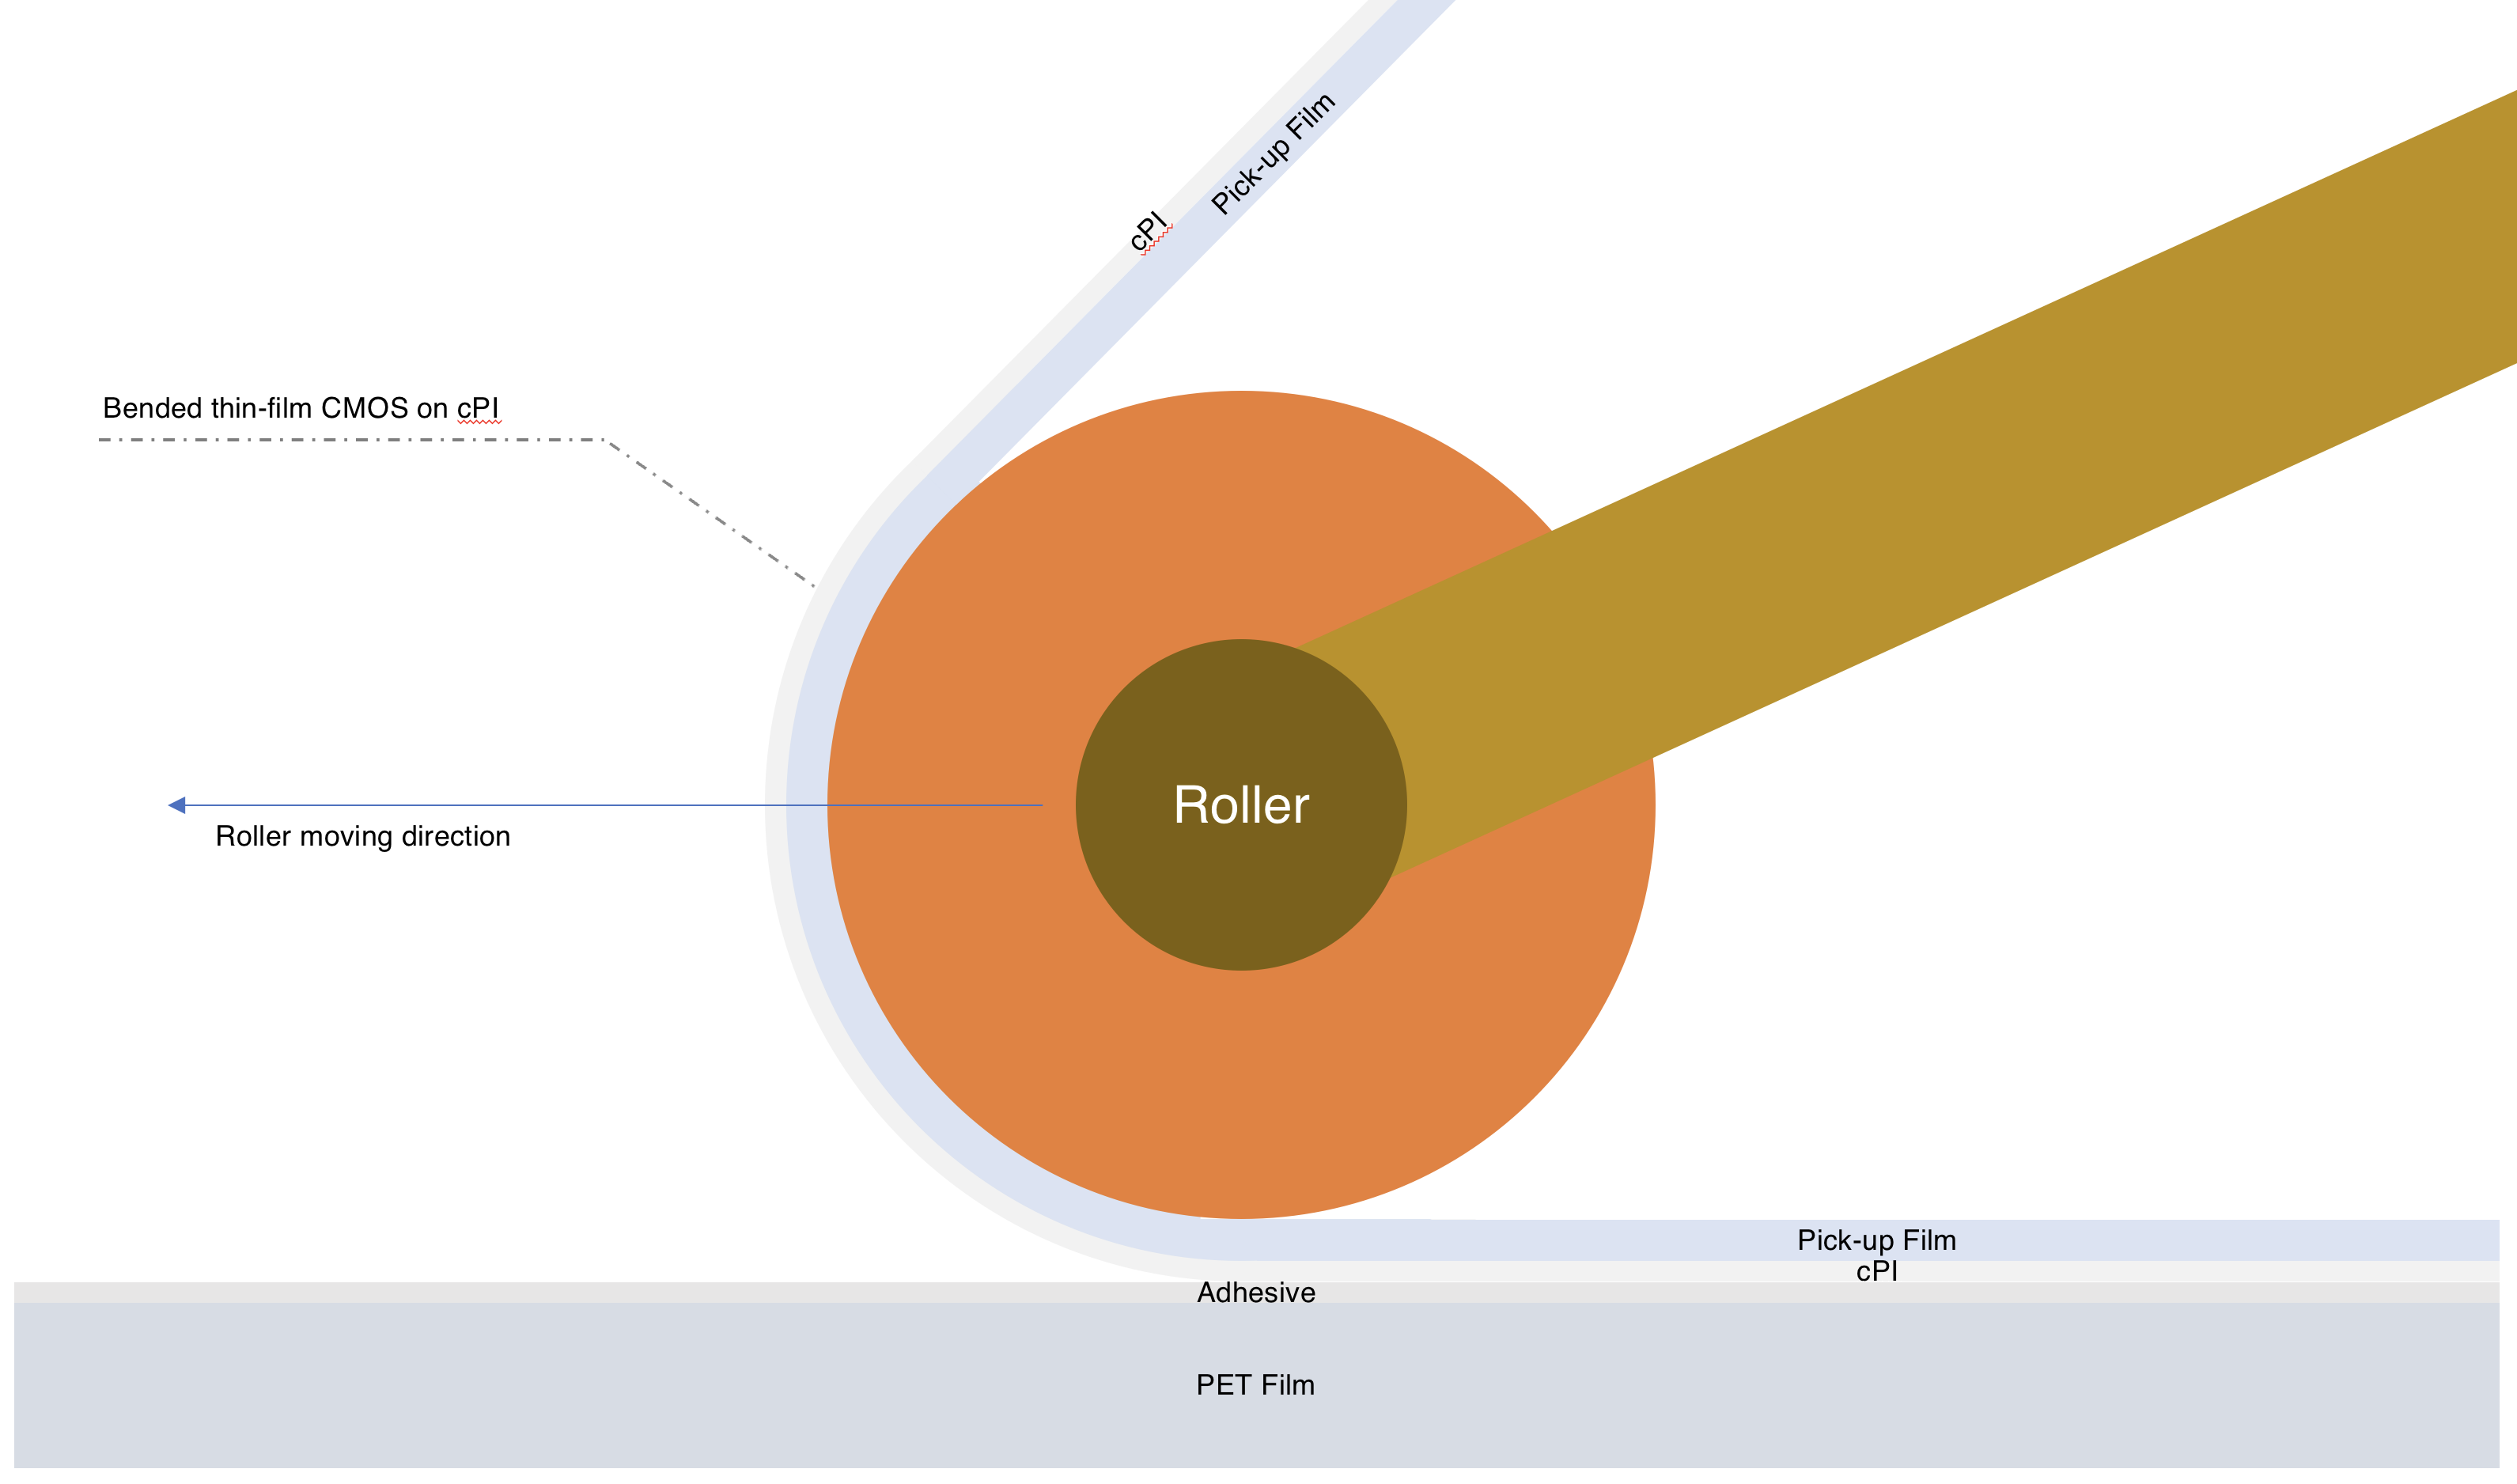
 Supplementary Figure 5 | Roll pressing during the transfer process.** Thin-film CMOS undergoes bending with a radius of curvature of 16mm.
